# Supplementary material for: Evaluation of an online injecting drug use stigma intervention targeted at health providers in New South Wales, Australia
Source: PubMed Central journal article supplement — Health Psychol Open. 2017 May 16;4(1):2055102917707180. doi: 10.1177/2055102917707180 (PMC5438038; doi:10.1177/2055102917707180), 2017-05-16
Supplement: supplementary_material.pdf [file supplementary_material.pdf]

Post-survey

What are the last 5 digits of your mobile phone number? We will use this to track your survey responses anonymously over time.

[ ][ ][ ][ ][ ]

1. The content is relevant to my job

| 1                 | 2 | 3 | 4       | 5 | 6 | 7              |
|-------------------|---|---|---------|---|---|----------------|
| Strongly disagree |   |   | Neutral |   |   | Strongly agree |

2. I can make a difference in my job by using what I have learned

| 1                 | 2 | 3 | 4       | 5 | 6 | 7              |
|-------------------|---|---|---------|---|---|----------------|
| Strongly disagree |   |   | Neutral |   |   | Strongly agree |

3. I have clear ideas about how I can use the new skills and knowledge

| 1                 | 2 | 3 | 4       | 5 | 6 | 7              |
|-------------------|---|---|---------|---|---|----------------|
| Strongly disagree |   |   | Neutral |   |   | Strongly agree |

4. I intend to use the new skills and knowledge

| 1                 | 2 | 3 | 4       | 5 | 6 | 7              |
|-------------------|---|---|---------|---|---|----------------|
| Strongly disagree |   |   | Neutral |   |   | Strongly agree |

5. The course provided a thorough coverage of the subject matter

| 1                 | 2 | 3 | 4       | 5 | 6 | 7              |
|-------------------|---|---|---------|---|---|----------------|
| Strongly disagree |   |   | Neutral |   |   | Strongly agree |

6. The content was

| 1         | 2 | 3 | 4          | 5 | 6 | 7           |
|-----------|---|---|------------|---|---|-------------|
| Too basic |   |   | Just right |   |   | Too complex |

7. Please include any additional feedback you would like to provide on the module.

---

8. The following statements are about people who inject drugs. For each, please note whether you agree or disagree with the statement. There are no correct answers, only your opinions

|                                                                                                                       | Strongly disagree        | Disagree                 | Neither agree nor disagree | Agree                    | Strongly agree           |
|-----------------------------------------------------------------------------------------------------------------------|--------------------------|--------------------------|----------------------------|--------------------------|--------------------------|
| I won't associate with people who inject drugs if I can help it.                                                      | <input type="checkbox"/> | <input type="checkbox"/> | <input type="checkbox"/>   | <input type="checkbox"/> | <input type="checkbox"/> |
| The sight of people injecting drugs does not particularly bother me                                                   | <input type="checkbox"/> | <input type="checkbox"/> | <input type="checkbox"/>   | <input type="checkbox"/> | <input type="checkbox"/> |
| People who inject drugs are criminals who should be in jail to protect society                                        | <input type="checkbox"/> | <input type="checkbox"/> | <input type="checkbox"/>   | <input type="checkbox"/> | <input type="checkbox"/> |
| I think people who inject drugs are disgusting                                                                        | <input type="checkbox"/> | <input type="checkbox"/> | <input type="checkbox"/>   | <input type="checkbox"/> | <input type="checkbox"/> |
| Injecting drug use is just plain wrong                                                                                | <input type="checkbox"/> | <input type="checkbox"/> | <input type="checkbox"/>   | <input type="checkbox"/> | <input type="checkbox"/> |
| Injecting drug use is merely a different kind of lifestyle that should not be condemned                               | <input type="checkbox"/> | <input type="checkbox"/> | <input type="checkbox"/>   | <input type="checkbox"/> | <input type="checkbox"/> |
| Injecting drug use is immoral                                                                                         | <input type="checkbox"/> | <input type="checkbox"/> | <input type="checkbox"/>   | <input type="checkbox"/> | <input type="checkbox"/> |
| Those in favour of injecting drug use tend to be injecting drug users themselves                                      | <input type="checkbox"/> | <input type="checkbox"/> | <input type="checkbox"/>   | <input type="checkbox"/> | <input type="checkbox"/> |
| There should be no restrictions on injecting drug use                                                                 | <input type="checkbox"/> | <input type="checkbox"/> | <input type="checkbox"/>   | <input type="checkbox"/> | <input type="checkbox"/> |
| I avoid people who inject drugs whenever possible                                                                     | <input type="checkbox"/> | <input type="checkbox"/> | <input type="checkbox"/>   | <input type="checkbox"/> | <input type="checkbox"/> |
| There is no reason to restrict the places where people who inject drugs work                                          | <input type="checkbox"/> | <input type="checkbox"/> | <input type="checkbox"/>   | <input type="checkbox"/> | <input type="checkbox"/> |
| People should feel sympathetic and understanding of people who inject drugs, who are unfairly attacked in our society | <input type="checkbox"/> | <input type="checkbox"/> | <input type="checkbox"/>   | <input type="checkbox"/> | <input type="checkbox"/> |

---

**The next part of the surveys consists of some hypothetical scenarios. We would like you to give your opinion on the actions depicted in each of these. Please note that there is no right or wrong answer, only your opinions.**

9. A health worker is treating a patient who injects drugs who also suffers a painful medical condition. The patient insists on pain relief but the health worker worries that the patient does not actually have bad pain but is 'drug shopping'. On a scale from 1 to 10, how likely would you be to feel the same way as this health worker?

---

|                  |   |   |   |   |   |   |   |   |                |
|------------------|---|---|---|---|---|---|---|---|----------------|
| 1                | 2 | 3 | 4 | 5 | 6 | 7 | 8 | 9 | 10             |
| Most<br>Unlikely |   |   |   |   |   |   |   |   | Most<br>likely |

---

10. A patient who injects drugs walks into a service complaining of severe migraines and requesting pain relief. A health worker informs her that she cannot be accommodated at this service and she should go elsewhere. On a scale from 1 to 10, how likely would you be to agree with this health worker?

---

|                  |   |   |   |   |   |   |   |   |                |
|------------------|---|---|---|---|---|---|---|---|----------------|
| 1                | 2 | 3 | 4 | 5 | 6 | 7 | 8 | 9 | 10             |
| Most<br>unlikely |   |   |   |   |   |   |   |   | Most<br>Likely |

---

11. The workers at a health service which caters to a large number of people who inject drugs decide that they will not leave a patient who injects drugs unattended in the waiting room and/or alone in the examining/treatment room. The worker is worried the patient may steal from the service or other patients. On a scale from 1 to 10, how likely are you to support this decision?

---

|                  |   |   |   |   |   |   |   |   |                |
|------------------|---|---|---|---|---|---|---|---|----------------|
| 1                | 2 | 3 | 4 | 5 | 6 | 7 | 8 | 9 | 10             |
| Most<br>unlikely |   |   |   |   |   |   |   |   | Most<br>Likely |

---

12. A health worker has a client who has a need for regular and on-going medical care. However the client continues to inject drugs. As a result the health worker feels that she can't continue to see him until he completely stops his drug use. The clients says he can't stop but will try to cut down, however the health worker feels that he may not be honest about his reduction in drug use and decides to discontinue his treatment anyway . If faced with a similar situation, how likely would you be to do the same as this health worker

---

|                  |   |   |   |   |   |   |   |   |                |
|------------------|---|---|---|---|---|---|---|---|----------------|
| 1                | 2 | 3 | 4 | 5 | 6 | 7 | 8 | 9 | 10             |
| Most<br>unlikely |   |   |   |   |   |   |   |   | Most<br>likely |

---

13. Imagine that someone has made an appointment at your service. This person is a current injecting drug user. What are the issues that come up for you when you learn this history about the new client Please rate on a scale from 1-10 with 1 being 'not a concern' and 10 being "a major concern'.

A. He/she may lie about their drug use

---

|               |   |   |   |   |   |   |   |   |                 |
|---------------|---|---|---|---|---|---|---|---|-----------------|
| 1             | 2 | 3 | 4 | 5 | 6 | 7 | 8 | 9 | 10              |
| Not a concern |   |   |   |   |   |   |   |   | A major concern |

---

B. He/she may be drug affected and not be coherent

---

|               |   |   |   |   |   |   |   |   |                 |
|---------------|---|---|---|---|---|---|---|---|-----------------|
| 1             | 2 | 3 | 4 | 5 | 6 | 7 | 8 | 9 | 10              |
| Not a concern |   |   |   |   |   |   |   |   | A major concern |

---

C. He/she may become violent

---

|               |   |   |   |   |   |   |   |   |                 |
|---------------|---|---|---|---|---|---|---|---|-----------------|
| 1             | 2 | 3 | 4 | 5 | 6 | 7 | 8 | 9 | 10              |
| Not a concern |   |   |   |   |   |   |   |   | A major concern |

---

D. You fear for your personal safety

---

|               |   |   |   |   |   |   |   |   |                 |
|---------------|---|---|---|---|---|---|---|---|-----------------|
| 1             | 2 | 3 | 4 | 5 | 6 | 7 | 8 | 9 | 10              |
| Not a concern |   |   |   |   |   |   |   |   | A major concern |

---

E. He/she may pressure you for medications

---

|               |   |   |   |   |   |   |   |   |                 |
|---------------|---|---|---|---|---|---|---|---|-----------------|
| 1             | 2 | 3 | 4 | 5 | 6 | 7 | 8 | 9 | 10              |
| Not a concern |   |   |   |   |   |   |   |   | A major concern |

---

F. You worry that he/she will interpret your behaviour as evidence that you are discriminating against him/her.

---

|               |   |   |   |   |   |   |   |   |                 |
|---------------|---|---|---|---|---|---|---|---|-----------------|
| 1             | 2 | 3 | 4 | 5 | 6 | 7 | 8 | 9 | 10              |
| Not a concern |   |   |   |   |   |   |   |   | A major concern |

---
